# Supplementary material for: Effectiveness and Safety of Mepolizumab in Combination with Corticosteroids in Patients with Eosinophilic Granulomatosis with Polyangiitis
Source: Research Square preprint supplement (doi:10.21203/rs.3.rs-96786/v1), 2020-10-28
Supplement: Supplementary file 1 [file 21e47216663b32364cba8514.docx]

| Case No. | age | sex | Asthma with eosinophilia | General symptoms | Nervous system | Lung | ENT | Heart | Renal | Palpable purpura | Abdominal | ANCA  positive status | Biopsy findings |
| --- | --- | --- | --- | --- | --- | --- | --- | --- | --- | --- | --- | --- | --- |
| 1 | 51 | M | 1 | 1 | 1 | 1 | 0 | 1 | 0 | 1 | 0 | 0 | 1 |
| 2 | 43 | F | 1 | 0 | 0 | 0 | 1 | 0 | 0 | 0 | 0 | 1 | 1 |
| 3 | 35 | F | 1 | 1 | 0 | 1 | 0 | 0 | 0 | 1 | 0 | 0 | 1 |
| 4 | 52 | M | 1 | 1 | 0 | 0 | 0 | 0 | 0 | 1 | 0 | 0 | 1 |
| 5 | 58 | F | 1 | 0 | 0 | 0 | 0 | 0 | 0 | 1 | 0 | 0 | 1 |
| 6 | 74 | F | 1 | 1 | 1 | 1 | 0 | 0 | 1 | 1 | 1 | 0 | 1 |
| 7 | 36 | F | 1 | 0 | 0 | 1 | 0 | 1 | 0 | 0 | 0 | 0 | 1 |
| 8 | 61 | F | 1 | 0 | 0 | 1 | 1 | 0 | 0 | 0 | 0 | 1 | 1 |
| 9 | 65 | M | 1 | 0 | 1 | 0 | 0 | 0 | 0 | 0 | 0 | 0 | 1 |
| 10 | 59 | F | 1 | 1 | 1 | 0 | 0 | 1 | 0 | 1 | 1 | 1 | 1 |
| 11 | 57 | M | 1 | 1 | 1 | 0 | 0 | 0 | 0 | 0 | 0 | 1 | 0 |
| 12 | 70 | M | 1 | 1 | 0 | 1 | 1 | 0 | 0 | 0 | 0 | 0 | 1 |
| 13 | 82 | M | 1 | 1 | 1 | 0 | 1 | 0 | 1 | 0 | 0 | 1 | 1 |
| 14 | 24 | F | 1 | 1 | 0 | 1 | 0 | 0 | 0 | 1 | 0 | 0 | 1 |
| 15 | 64 | M | 1 | 1 | 1 | 1 | 0 | 0 | 0 | 0 | 0 | 1 | 0 |
| 16 | 74 | F | 1 | 1 | 1 | 1 | 0 | 0 | 0 | 0 | 0 | 0 | 0 |

**Supplementary Table 1. Clinical manifestations at diagnosis**

ENT; Ear, Nose, Throat
